# Supplementary material for: Determination of Antioxidant Capacity and Total Phenolic and Ascorbic Acid Contents of Some Fruits and Vegetables with an Electrochemical Approach
Source: Research Square preprint supplement (doi:10.21203/rs.3.rs-1654076/v1), 2022-05-25
Supplement: Supplementary file 1 [file 08b9bdc331aaf03cd090aae0.docx]

Supplementary material

**Supplementary Figures**

**Figure S1.** CV voltammogram of electropolymerized poly (p-TSA) grown at 5 cycles in 0.1 M NaCl solution

**Figure S2.** DPV responses of 100 ppm Trolox at poly (*p*-TSA) electrode of different film thicknesses in PBS pH 7.4

**Figure S3.** DPV responses of 100 ppm Trolox in different electrolyte solutions

**Figure S4.** DPV responses of 19.6 ppm ascorbic acid, 19.2 ppm gallic acid and 1.9 ppm trolox in a 0.1 M NaNO₃ solution at the poly (*p*-TSA) modified sensor

**Figure S5.** DPV responses of gallic acid (19.2, 26.3, 34.8, 43.1, 51.3 ppm), 8.9 ppm Trolox and 19.2 ppm ascorbic acid in 0.1 M NaNO3 solution at the poly (*p*-TSA) modified sensor (a: background). The inner graph represents the curve showing the relationship between the measured current values versus increasing gallic acid concentrations

**Figure S6.** DPV responses of ascorbic acid (19.6, 37.7, 55.5, 72.6, 89.1 ppm), 1.9 ppm Trolox and 19.2 ppm gallic acid in 0.1 M NaNO3 solution at the poly (*p*-TSA) modified sensor (a: background). The inner graph represents the curve showing the relationship between the measured current values versus increasing ascorbic acid concentrations
